# Supplementary material for: Stabilizing the cathode–electrolyte interphase and enhancing Na+ kinetics by a boron-based anion receptor additive
Source: Royal Society of Chemistry journal article supplement (doi:10.1039/d4nj04788e), 2025-01-01
Supplement: d4nj04788e1.pdf [file d4nj04788e1.pdf]

## Supplementary Information

### **Stabilizing cathode-electrolyte interphase and enhancing Na<sup>+</sup> kinetics by boron-based anion receptor additive**

Jie Li<sup>a</sup>, Yufan Long<sup>a</sup>, Lei Li<sup>a</sup>, Fan Pu<sup>a</sup>, Wei Liao<sup>b</sup>, Xiaowen Yu<sup>b</sup>, Hongxin Liao<sup>c</sup>, Xuebu Hu<sup>a,\*</sup>

a College of Chemistry and Chemical Engineering, Chongqing University of Technology, Chongqing 400054, China

b Chongqing CEPREI Industrial Technology Research Institute Co. Ltd, Chongqing 401332, China

c Chongqing Hongyu Precision Industry Group Co. Ltd, Chongqing 402760, China

mail addresses: xuebu@cqut.edu.cn (X. B. Hu)

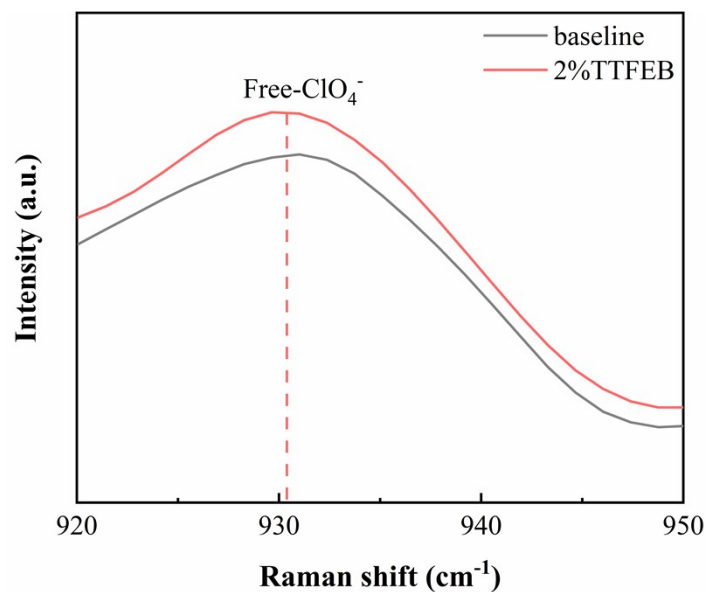

Fig. S1. The characteristic Raman spectra of  $\text{ClO}_4^-$  in different electrolytes.

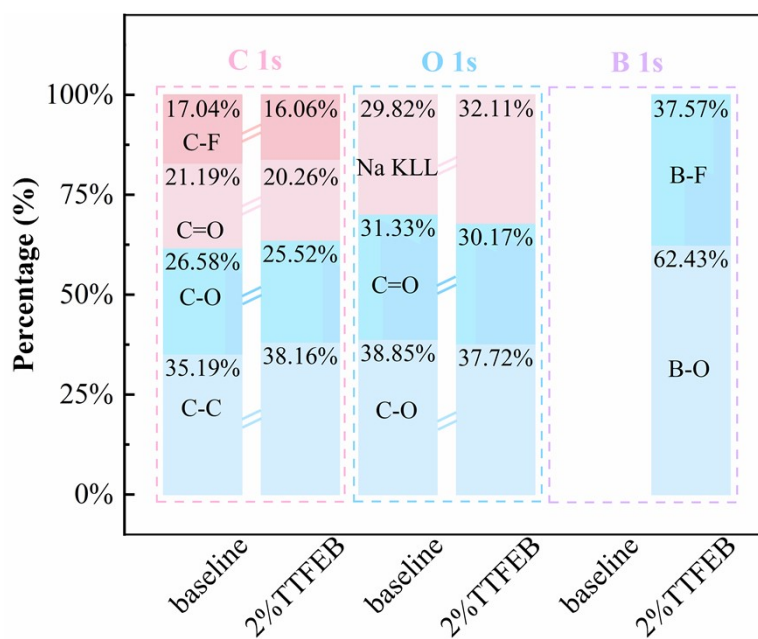

Fig. S2. The detailed percentage of each component from C1s, O1s, and B1s XPS spectra.
